# Supplementary material
Source: PubMed Central journal article supplement (PMC1568947)
Supplement: pnas_0600137103_8.pdf [file pnas_0600137103_8.pdf]

Table 1. Model Parameters

| <u>Reaction</u>                            | <u>Param</u>        | <u>Value</u>           | <u>Units</u> |
|--------------------------------------------|---------------------|------------------------|--------------|
| <u>Receptor Activation</u>                 |                     |                        |              |
| add_Ligand                                 | t_Ladd              | 2160                   | s            |
| add_Ligand                                 | L_pipette           | 0                      | uM           |
| add_Ligand                                 | tauL                | 1                      | s            |
| bind_L_b1AR                                | Kf                  | 1000                   | uM-1.s-1     |
| bind_L_b1AR                                | Kr                  | 285                    | s-1          |
| bind_Lb1AR_Gs                              | Kf                  | 1000                   | uM-1.s-1     |
| bind_Lb1AR_Gs                              | Kr                  | 62                     | s-1          |
| bind_b1AR_Gs                               | Kf                  | 1000                   | uM-1.s-1     |
| bind_b1AR_Gs                               | Kr                  | 33000                  | s-1          |
| bind_L_b1ARGs                              | Kf                  | 1000                   | uM-1.s-1     |
| bind_L_b1ARGs                              | Kd                  | 0.535714               | s-1          |
| <u>Receptor inhibition/desensitization</u> |                     |                        |              |
| add_propranolol                            | t_propadd           | 2420                   | s            |
| add_propranolol                            | Propranolol_pipette | 0                      | uM           |
| add_propranolol                            | tauPropranolol      | 1                      | s            |
| bind_b1AR_propranolol                      | Kf                  | 1000                   | uM-1.s-1     |
| bind_b1AR_propranolol                      | Kr                  | 8                      | s-1          |
| desens_bark                                | k_barkp             | 0.0011                 | s-1          |
| resens_bark                                | k_barkm             | 0.0022                 | s-1          |
| desens_pka                                 | kpkap               | 0.0036                 | uM-1.s-1     |
| desens_pka                                 | kpkam               | 0.0022                 | s-1          |
| <u>Gs activation</u>                       |                     |                        |              |
| LRG_activation                             | k_gact              | 16                     | s-1          |
| RG_activation                              | k_gact              | 16                     | s-1          |
| Gs_gtp_hydrolysis                          | khyd                | 0.8                    | s-1          |
| Gs_reassociation                           | k_reassoc           | 1210                   | uM-1.s-1     |
| <u>cAMP synthesis</u>                      |                     |                        |              |
| bind_Gs_AC                                 | Kf                  | 1000                   | uM-1.s-1     |
| bind_Gs_AC                                 | Kr                  | 400                    | s-1          |
| cAMP_synthesis_GsAC                        | Km                  | 315                    | uM           |
| cAMP_synthesis_GsAC                        | Vmax                | (k_ac_gsa * GsAC_cell) | uM.s-1       |
| cAMP_synthesis_GsAC                        | k_ac_gsa            | 2.5                    | s-1          |
| bind_FskAC                                 | Kf                  | 1000                   | uM-1.s-1     |
| bind_FskAC                                 | Kr                  | 860000                 | s-1          |
| cAMP_synthesis_FskAC                       | Km                  | 860                    | uM           |
| cAMP_synthesis_FskAC                       | Vmax                | (kfsk * FskAC_cell)    | uM.s-1       |
| cAMP_synthesis_FskAC                       | kfsk                | 7.3                    | s-1          |
| cAMP_photolysis                            | kphot               | 0.1                    | uM-1.s-1     |
| cAMP_photolysis                            | ton_global_light    | 0                      | s            |
| cAMP_photolysis                            | toff_global_light   | 0                      | s            |
| cAMP_photolysis                            | ton_local_light     | 0                      | s            |
| cAMP_photolysis                            | toff_local_light    | 0                      | s            |
| <u>cAMP degradation</u>                    |                     |                        |              |

|                  |      |       |          |
|------------------|------|-------|----------|
| bind_PDEcAMP     | Kf   | 1000  | uM-1.s-1 |
| bind_PDEcAMP     | Kr   | 1300  | s-1      |
| cAMP_degradation | kpde | 5     | s-1      |
| inhibit_PDE      | Kf   | 1000  | uM-1.s-1 |
| inhibit_PDE      | Kr   | 30000 | s-1      |

### PKA activation

|               |    |      |          |
|---------------|----|------|----------|
| bind_RC_cAMP  | Kf | 1000 | uM-1.s-1 |
| bind_RC_cAMP  | Kr | 9140 | s-1      |
| bind_cAMP_ARC | Kf | 1000 | uM-1.s-1 |
| bind_cAMP_ARC | Kr | 1640 | s-1      |
| bind_A2R_PKAC | Kf | 4375 | s-1      |
| bind_A2R_PKAC | Kr | 1000 | uM-1.s-1 |
| inhib_PKAC    | Kf | 1000 | uM-1.s-1 |
| inhib_PKAC    | Kr | 0.2  | s-1      |

### AKAR phosphorylation

|                |               |       |          |
|----------------|---------------|-------|----------|
| bind_PKAC_AKAR | Kf            | 1000  | uM-1.s-1 |
| bind_PKAC_AKAR | Kr            | 21000 | s-1      |
| AKAR_phosph    | kpka_akar     | 54    | s-1      |
| bind_AKARp_PP  | Kf            | 1000  | uM-1.s-1 |
| bind_AKARp_PP  | Kr            | 7000  | s-1      |
| AKARp_dephosph | kcat_PP_AKARp | 8.5   | s-1      |
