# Supplementary material
Source: PubMed Central journal article supplement (PMC1568947)
Supplement: pnas_0600137103_9.pdf [file pnas_0600137103_9.pdf]

Table 2. Model Reactions

| Reaction                                   | Equation                                                                                                                                                                                  | Units  |
|--------------------------------------------|-------------------------------------------------------------------------------------------------------------------------------------------------------------------------------------------|--------|
| <u>Receptor Activation</u>                 |                                                                                                                                                                                           |        |
| add_Ligand                                 | $((t > t\_Ladd) * (L\_pipette - L\_cell) / \tau L)$                                                                                                                                       | uM.s-1 |
| bind_L_b1AR                                | $((Kf * L\_cell) * b1AR\_cell) - (Kr * L\_b1AR\_cell)$                                                                                                                                    | uM.s-1 |
| bind_Lb1AR_Gs                              | $((Kf * Gs\_cell) * L\_b1AR\_cell) - (Kr * L\_b1AR\_Gs\_cell)$                                                                                                                            | uM.s-1 |
| bind_L_b1ARGs                              | $((Kf * b1AR\_Gs\_cell) * L\_cell) - (Kd * L\_b1AR\_Gs\_cell)$                                                                                                                            | uM.s-1 |
| bind_b1AR_Gs                               | $((Kf * b1AR\_cell) * Gs\_cell) - (Kr * b1AR\_Gs\_cell)$                                                                                                                                  | uM.s-1 |
| <u>Receptor inhibition/desensitization</u> |                                                                                                                                                                                           |        |
| add_propranolol                            | $((t > t\_propadd) * (Propranolol\_pipette - Propranolol\_cell) / \tau Propranolol)$                                                                                                      | uM.s-1 |
| bind_b1AR_propranolol                      | $((Kf * Propranolol\_cell) * b1AR\_cell) - (Kr * b1ARinh\_cell)$                                                                                                                          | uM.s-1 |
| desens_bark                                | $(k\_barkp * (L\_b1AR\_cell + L\_b1AR\_Gs\_cell))$                                                                                                                                        | uM.s-1 |
| resens_bark                                | $(k\_barkm * b1AR\_S464\_cell)$                                                                                                                                                           | uM.s-1 |
| desens_pka                                 | $((kpkap * PKAC\_cell * (L\_b1AR\_Gs\_cell + b1AR\_cell + L\_b1AR\_cell)) - (kpkam * b1AR\_p\_cell))$                                                                                     | uM.s-1 |
| <u>Gs activation</u>                       |                                                                                                                                                                                           |        |
| LRG_activation                             | $(k\_gact * L\_b1AR\_Gs\_cell)$                                                                                                                                                           | uM.s-1 |
| RG_activation                              | $(k\_gact * b1AR\_Gs\_cell)$                                                                                                                                                              | uM.s-1 |
| Gs_gtp_hydrolysis                          | $(khyd * Gsa\_gtp\_cell)$                                                                                                                                                                 | uM.s-1 |
| Gs_reassociation                           | $(k\_reassoc * Gsa\_gdp\_cell * Gsbg\_cell)$                                                                                                                                              | uM.s-1 |
| <u>cAMP synthesis</u>                      |                                                                                                                                                                                           |        |
| bind_Gs_AC                                 | $((Kf * Gsa\_gtp\_cell) * AC\_cell) - (Kr * GsAC\_cell)$                                                                                                                                  | uM.s-1 |
| cAMP_synthesis_GsAC                        | $(Vmax * ATP\_cell / (Km + ATP\_cell))$                                                                                                                                                   | uM.s-1 |
| bind_FskAC                                 | $((Kf * AC\_cell) * Fsk\_cell) - (Kr * FskAC\_cell)$                                                                                                                                      | uM.s-1 |
| cAMP_synthesis_FskAC                       | $(Vmax * ATP\_cell / (Km + ATP\_cell))$                                                                                                                                                   | uM.s-1 |
| cAMP_photolysis                            | $(kphot * light * DMNB\_cAMP\_cell)$<br>where light = $((t > ton\_global\_light) * (t < toff\_global\_light)) + ((t > ton\_local\_light) * (t < toff\_local\_light) * light\_spot\_cell)$ | uM.s-1 |
| <u>cAMP degradation</u>                    |                                                                                                                                                                                           |        |
| bind_PDEcAMP                               | $((Kf * PDE\_cell) * cAMP\_cell) - (Kr * PDEcAMP\_cell)$                                                                                                                                  | uM.s-1 |
| cAMP_degradation                           | $(kpde * PDEcAMP\_cell)$                                                                                                                                                                  | uM.s-1 |
| inhibit_PDE                                | $((Kf * PDE\_cell) * IBMX\_cell) - (Kr * PDE\_IBMX\_cell)$                                                                                                                                | uM.s-1 |
| <u>PKA activation</u>                      |                                                                                                                                                                                           |        |
| bind_RC_cAMP                               | $((Kf * RC\_cell) * cAMP\_cell) - (Kr * ARC\_cell)$                                                                                                                                       | uM.s-1 |
| bind_cAMP_ARC                              | $((Kf * ARC\_cell) * cAMP\_cell) - (Kr * A2RC\_cell)$                                                                                                                                     | uM.s-1 |
| bind_A2R_PKAC                              | $(Kf * A2RC\_cell) - ((Kr * A2R\_cell) * PKAC\_cell)$                                                                                                                                     | uM.s-1 |
| inhib_PKAC                                 | $((Kf * PKAC\_cell) * PKI\_cell) - (Kr * PKAC\_PKI\_cell)$                                                                                                                                | uM.s-1 |
| <u>AKAR phosphorylation</u>                |                                                                                                                                                                                           |        |
| bind_PKAC_AKAR                             | $((Kf * AKAR\_cell) * PKAC\_cell) - (Kr * PKAC\_AKAR\_cell)$                                                                                                                              | uM.s-1 |
| AKAR_phosph                                | $(kpk\_akar * PKAC\_AKAR\_cell)$                                                                                                                                                          | uM.s-1 |
| bind_AKARp_PP                              | $((Kf * PP\_cell) * AKARp\_cell) - (Kr * PP\_AKARp\_cell)$                                                                                                                                | uM.s-1 |
| AKARp_dephosph                             | $(kcat\_PP\_AKARp * PP\_AKARp\_cell)$                                                                                                                                                     | uM.s-1 |
