# Supplementary material
Source: PubMed Central journal article supplement (PMC1568947)

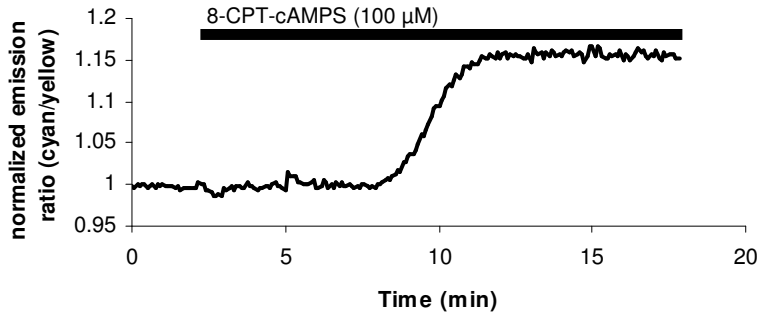

Supplement: pnas_0600137103_1.pdf [file pnas_0600137103_1.pdf]

**A**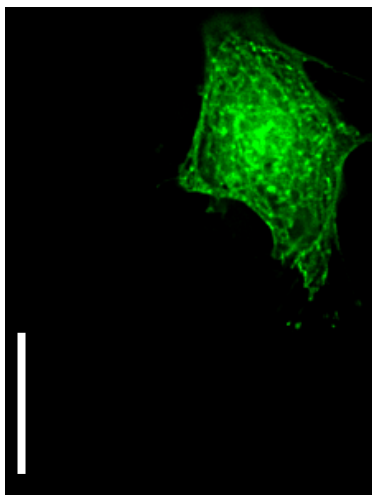

AKAR2

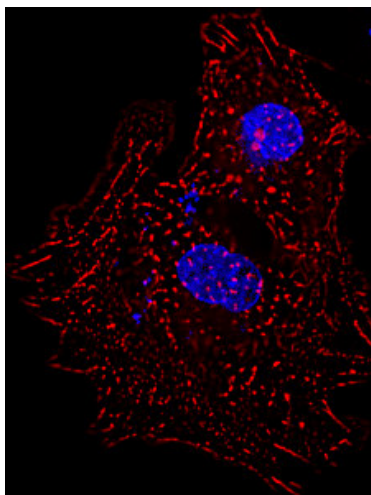 $\alpha$ -actinin + DAPI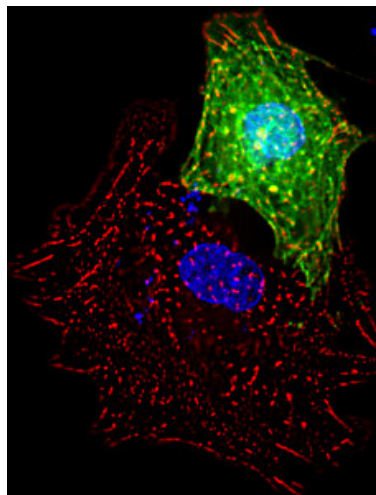

Merge

**B**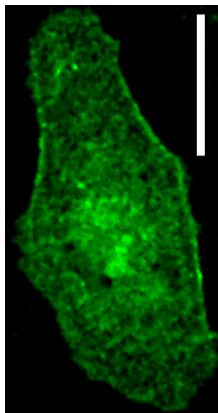

pmAKAR2

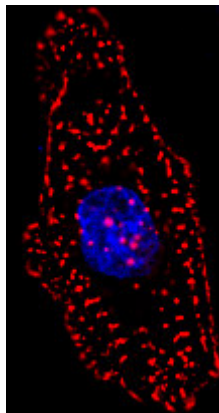 $\alpha$ -actinin + DAPI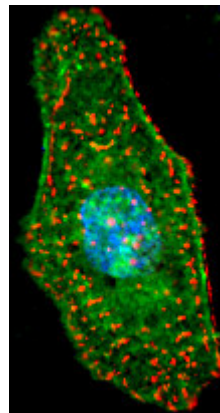

Merge

Supplement: pnas_0600137103_2.pdf [file pnas_0600137103_2.pdf]

**A**

AKAR2

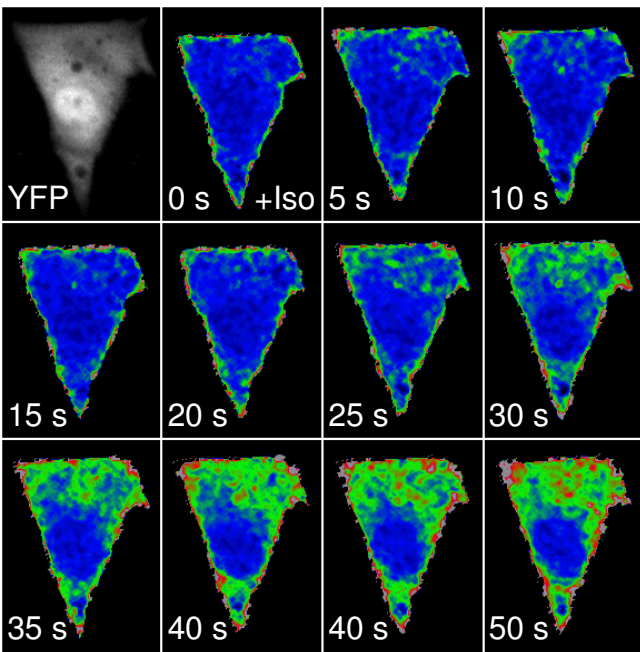

0.9 1.8

normalized emission ratio (yellow/cyan)

0.9 1.8

pmAKAR2

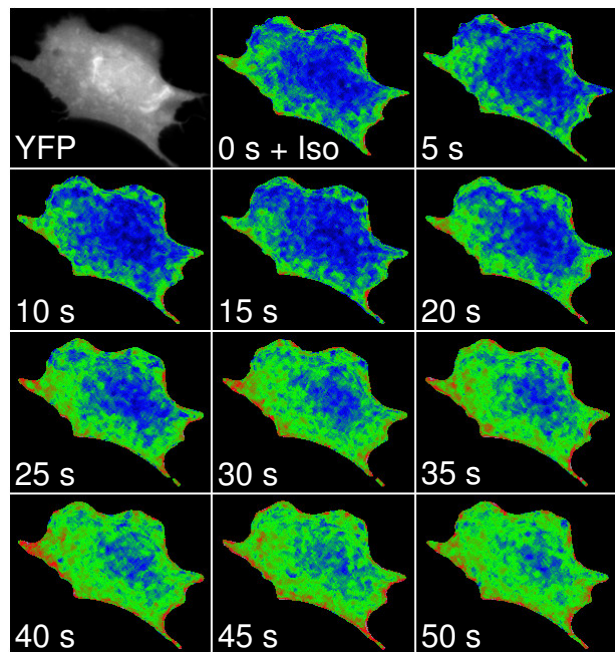**B**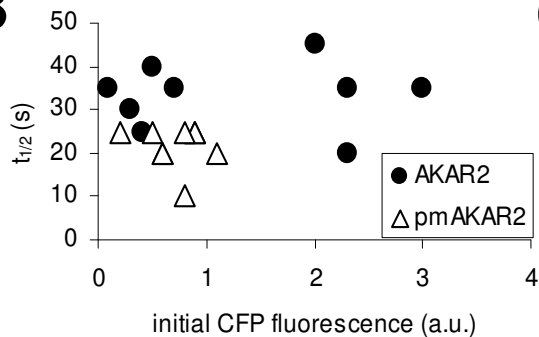**C**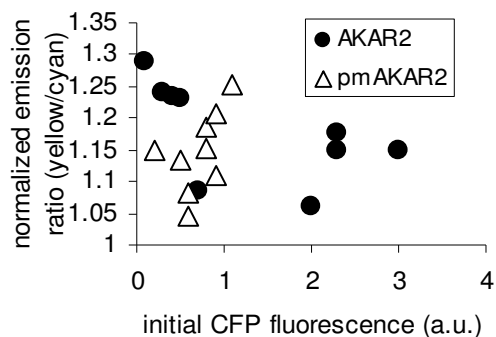

Supplement: pnas_0600137103_3.pdf [file pnas_0600137103_3.pdf]

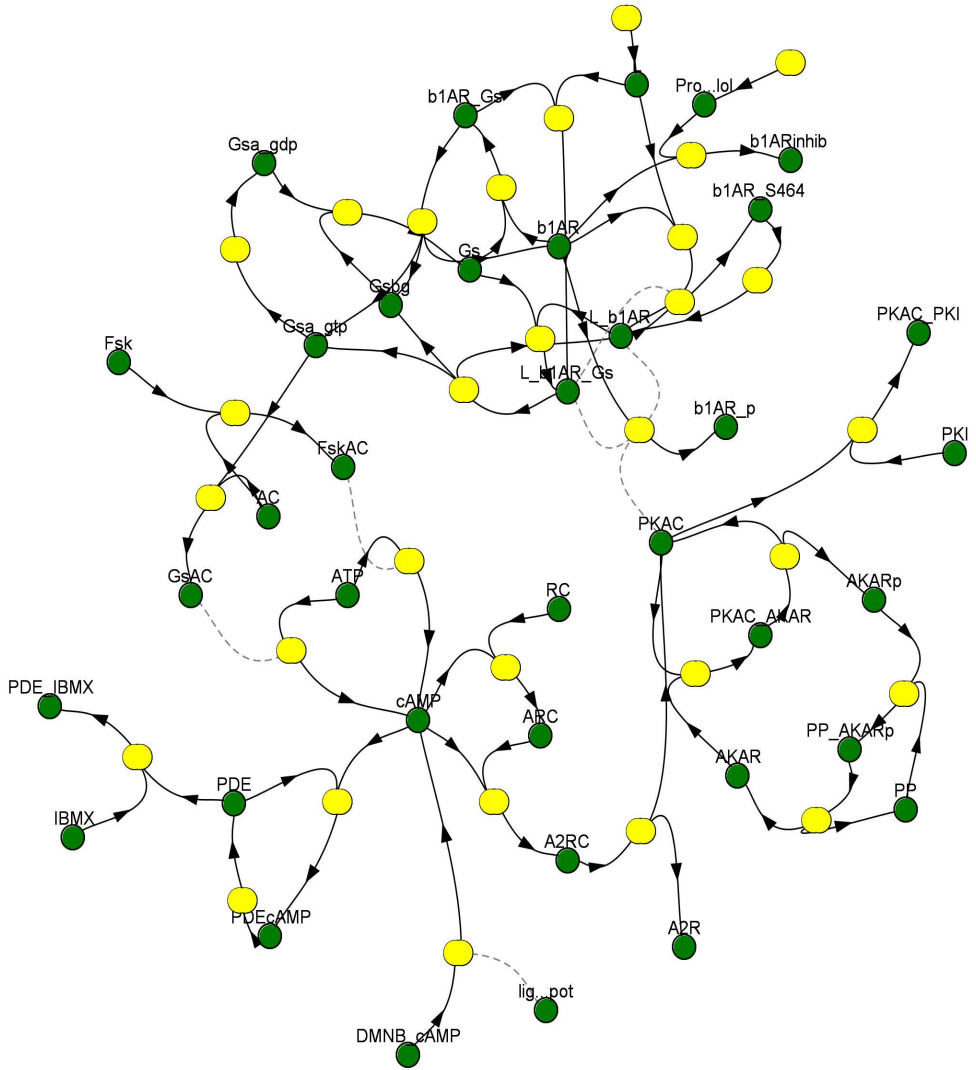

Supplement: pnas_0600137103_4.pdf [file pnas_0600137103_4.pdf]

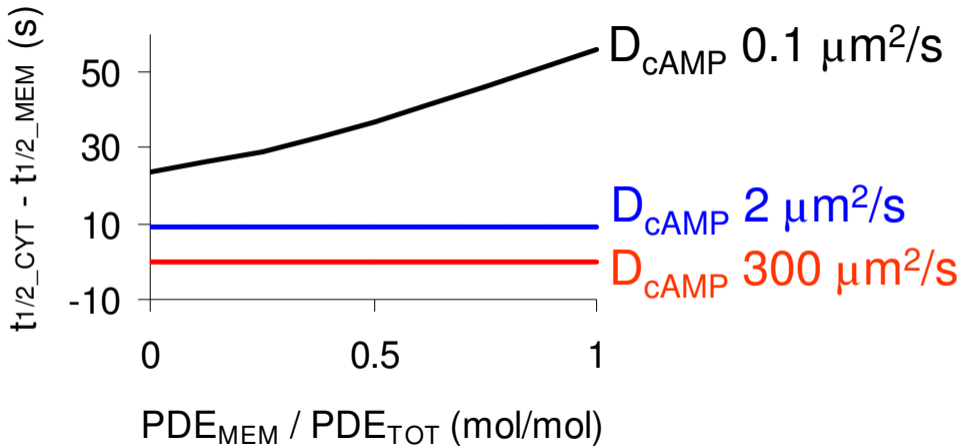

Supplement: pnas_0600137103_5.pdf [file pnas_0600137103_5.pdf]

# experiment

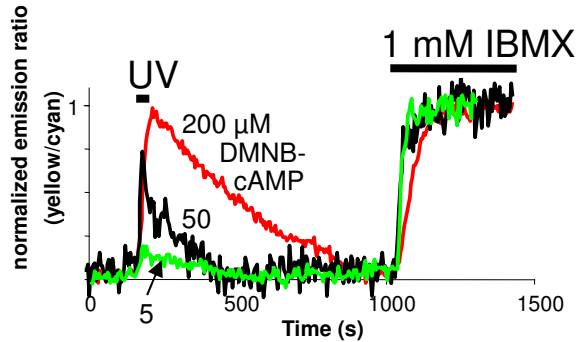

# model

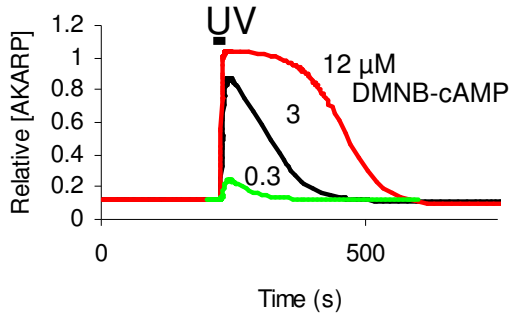

Supplement: pnas_0600137103_6.pdf [file pnas_0600137103_6.pdf]

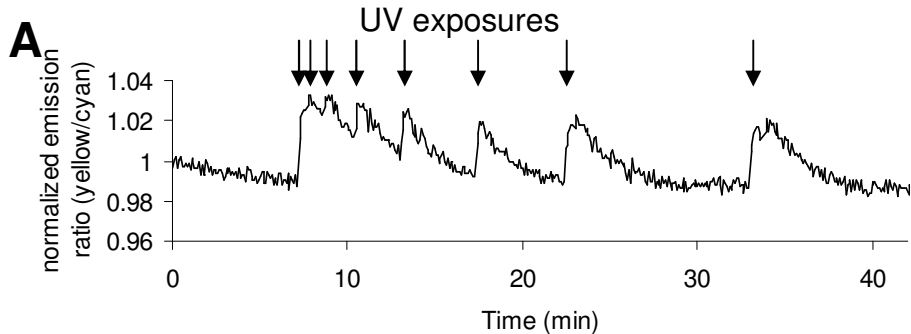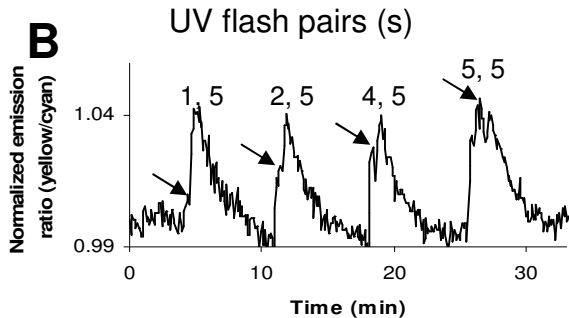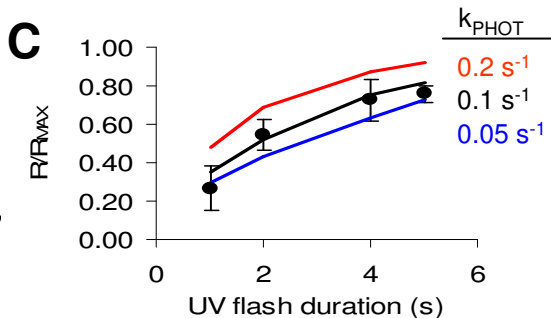

Supplement: pnas_0600137103_7.pdf [file pnas_0600137103_7.pdf]
